# Supplementary material for: FAR1/FHY3 Transcription Factors Positively Regulate the Salt and Temperature Stress Responses in Eucalyptus grandis
Source: Front Plant Sci. 2022 May 4;13:883654. doi: 10.3389/fpls.2022.883654 (PMC9115564; doi:10.3389/fpls.2022.883654)
Supplement: Supplementary file 3 [file Table_3.XLSX]

## Sheet: Eg
The motif feature of EgFAR1/FHY3 proteins
Group	Protein_name	motif1	motif2	motif3	motif4	motif5	motif6	motif7	motif8	motif9	motif10	motif11	motif12	motif13	motif14	motif15
Ⅰ	EgFAR1		√				√			√			√
	EgFAR2		√				√			√			√
	EgFAR3	√	√	√	√	√	√	√	√	√	√	√		√		√
	EgFAR4	√	√	√	√	√	√	√	√	√	√	√		√		√
	EgFAR8	√	√	√	√	√	√	√	√	√	√	√		√		√
	EgFAR10	√	√	√	√	√	√	√	√	√	√	√		√		√
	EgFAR12	√	√	√	√	√	√	√	√	√	√	√		√		√
	EgFAR13	√	√	√	√	√	√	√	√	√	√	√		√		√
	EgFAR21	√	√		√	√	√	√	√	√	√	√	√	√	√	√
	EgFAR22	√	√	√	√	√	√	√	√	√	√	√		√		√
	EgFAR29	√	√	√	√	√	√	√	√	√	√	√	√	√	√	√
	EgFAR30	√	√	√	√		√	√		√				√
	EgFAR31	√	√	√	√	√	√	√	√	√	√	√		√
	EgFAR32	√	√	√	√		√	√	√	√				√	√
	EgFAR33		√				√			√			√
Ⅱ	EgFAR14	√	√	√	√	√	√	√		√	√	√
	EgFAR15	√	√	√	√	√	√	√	√	√	√	√
	EgFAR16	√	√	√	√	√	√	√	√	√	√	√	√	√		√
	EgFAR17	√	√		√	√	√	√	√	√	√	√
	EgFAR23	√	√	√	√	√	√	√		√	√	√	√	√		√
	EgFAR24	√	√	√	√	√	√	√	√	√	√	√		√
Ⅲ	EgFAR5	√	√	√	√	√	√	√	√	√	√	√		√	√	√
	EgFAR6	√	√	√	√	√	√	√	√	√	√	√	√	√	√	√
	EgFAR7	√	√	√	√	√	√	√	√	√	√	√	√	√
	EgFAR9	√	√	√	√	√	√	√	√	√		√	√	√	√	√
	EgFAR11		√	√			√	√		√			√		√
	EgFAR18	√	√	√	√	√	√	√	√	√	√	√	√	√	√	√
	EgFAR19	√	√	√	√	√	√	√	√	√	√	√	√	√	√	√
	EgFAR20	√	√	√	√	√		√		√		√	√	√	√
	EgFAR25	√	√	√	√	√	√	√	√	√	√	√	√	√	√	√
	EgFAR26	√	√	√	√	√	√	√	√	√	√	√	√	√	√	√
	EgFAR27		√				√			√			√
	EgFAR28	√		√	√		√		√	√	√		√	√	√

## Sheet: At
The motif feature of AtFAR1/FHY3 proteins
Group	Gene name	motif1	motif2	motif3	motif4	motif5	motif6	motif7	motif8	motif9	motif10	motif11	motif12	motif13	motif14	motif15
I	At1G52520	√	√	√	√	√	√	√	√	√	√	√	√		√
	At1G76320	√	√	√		√	√	√	√	√	√	√	√		√
	At1G80010	√	√	√	√	√	√	√	√	√	√	√	√		√
	At2G27110	√	√	√	√	√	√	√	√	√		√	√		√	√
	At2G32250	√	√	√	√	√	√	√	√	√	√	√	√		√
	At2G43280			√	√						√					√
	At3G06250	√	√	√	√	√	√	√	√	√	√	√	√	√	√
	At3G07500			√	√						√					√
	At3G22170	√	√	√	√	√	√	√	√	√	√	√	√		√
	At3G59470			√	√						√					√
	At4G12850			√	√						√					√
	At4G15090	√	√	√	√	√	√	√	√	√	√	√	√		√
	At4G19990	√		√	√	√	√	√	√	√	√	√
	At4G38180	√	√	√	√	√	√	√	√	√	√	√	√		√	√
	At5G18960	√	√	√	√	√	√	√	√	√	√	√	√	√	√
II	At5G28530	√	√	√	√	√	√	√	√				√
	At1G10240	√	√	√	√	√	√	√	√	√		√	√

## Sheet: Eg-At
Eg			At
motif1	MGGKAPKTIFTDQDKALAKAIREVFPNTQHRLCLWHIMKKA		motif1	WNAEKLEASCSCQMFEYKGYLCRHALLVLQVSGILEIPPQYILKRWTKBA
motif2	MEFESEDEAYNFYNEYAREKGFGVRKSSS		motif2	FWADAKSRVDYSSFGDVVVFDTSYRSNKYKLPLATFVGVNHHGQPVLLGC
motif3	FVGVNHHGKNVLFGCALLLDETAESFIWL		motif3	PRSSTRTGCKAMIHVKRRDSGKWVVTKFVKEHNHELLP
motif4	MIERFGLEDNEWLQSLYELRHKWAPAFLRDIFSAGM		motif4	EPYVGMEFESEEEAYEFYBEYARRVGFVIR
motif5	ISCSCKLFESKGWLCRHALHVL		motif5	FERRWSKLVBKFGLRDBEWLRSLYEDREKWVPVYLRDTFLA
motif6	GKWEVIEFVKEHNHELLPEDQ		motif6	RAPQVILTDQDKAJKAAVAZVFPGTRHRFSLWHVLSKJ
motif7	RLRNLFWSDSLSKFDYDCFGDVVVFDTTY		motif7	QPELKTPSPFEKQAAEVYTREIFKKFQEEVVGAVACHPRKE
motif8	LEGGDCQLLLBHFHQMQLZNPNFFYAVQL		motif8	LLEYFKRMQAENPNFFYAVDLDEDQSLRNV
motif9	KRERKETRCGCKAMIKFKVEB		motif9	NSFFDKYVHKKTSLKEFLELYEKALZKRYEEEAKADFESLN
motif10	LKSPSPIEKHAASVYTRAIFKKFQEELLG		motif10	IKSSRRSRRDGEFIDRKFVCSKEGFKRES
motif11	NVFSIPSQYILKRWTKDAKSG		motif11	DTRAQRYNDLCRRALKLVEEGSLSLESYKIALEALREALKKV
motif12	VKNDKGEITRRTFVCNCEGYSINSSDQEK		motif12	LLADESKESFVWLFQTWLRAM
motif13	QRSESTNNVFDKYVKKTTTLKZFVHYYEEQL		motif13	RMGCGAYMRIKRQDSGGWIVDRLNKDHNHDLEPGKKN
motif14	TCKGVLVDMAKAGIGGTTAYKFLANEAGG		motif14	HDEFMKEFEKCIYQSWTVEE
motif15	SKVQRFNDLMQRAFELMEEGALSQETYRIAKKALKEALKKI		motif15	DKKIQELTEELEAEKRRCAAYKEQLDSFLKEVEEHSEQLSIKVQNIVENV
