# Supplementary material for: FAR1/FHY3 Transcription Factors Positively Regulate the Salt and Temperature Stress Responses in Eucalyptus grandis
Source: Front Plant Sci. 2022 May 4;13:883654. doi: 10.3389/fpls.2022.883654 (PMC9115564; doi:10.3389/fpls.2022.883654)
Supplement: Supplementary file 4 [file Table_4.XLSX]

## Sheet: Sheet1
Properties of secondary structures of EgFAR1/FHY3 proteins
Group	Protein_name	β-Sheet	β-Bridge	Bend	Turn	α-Helix	3-Helix	Coil	Ramachandran plot
Ⅰ	EgFAR1	33(12.69%)	2(0.77%)	15(5.77%)	11(4.23%)	69(26.54%)	0(0%)	130(50%)	96%
	EgFAR2	31(10.62%)	2(0.68%)	13(4.45%)	15(5.14%)	91(31.16%)	0(0%)	140(47.95%)	95.7%
	EgFAR3	102(12.03%)	4(0.47%)	49(5.78%)	71(8.37%)	252(29.72%)	15(1.77%)	355(41.86%)	84.6%
	EgFAR4	100(12.11%)	2(0.24%)	46(5.57%)	60(7.26%)	253(30.63%)	19(2.3%)	346(41.89%)	87.7%
	EgFAR8	99(13.47%)	4(0.54%)	49(6.67%)	63(8.57%)	230(31.29%)	40(5.44%)	250(34.01%)	91.6%
	EgFAR10	97(14.88%)	2(0.31%)	40(6.13%)	73(11.2%)	233(35.74%)	26(3.99%)	181(27.76%)	98%
	EgFAR12	101(12.26%)	4(0.49%)	43(5.22%)	75(9.1%)	243(29.49%)	25(3.03%)	333(40.41%)	86.4%
	EgFAR13	100(11.38%)	2(0.23%)	75(8.53%)	69(7.85%)	260(29.58%)	18(2.05%)	355(40.39%)	87.3%
	EgFAR21	75(10.08%)	2(0.27%)	48(6.45%)	70(9.41%)	318(42.74%)	21(2.82%)	210(28.23%)	96.5%
	EgFAR22	110(14.63%)	4(0.53%)	52(6.91%)	70(9.31%)	231(30.72%)	16(2.13%)	269(35.77%)	94.6%
	EgFAR29	93(11.73%)	2(0.25%)	53(6.68%)	74(9.33%)	322(40.61%)	30(3.78%)	219(27.62%)	96.5%
	EgFAR30	76(18.77%)	0(0%)	29(7.16%)	49(12.1%)	128(31.6%)	4(0.99%)	119(29.38%)	99.2%
	EgFAR31	111(16.3%)	2(0.29%)	45(6.61%)	69(10.13%)	202(29.66%)	28(4.11%)	224(32.89%)	98%
	EgFAR32	75(14.94%)	0(0%)	32(6.37%)	57(11.35%)	157(31.27%)	3(0.6%)	178(35.46%)	95.6%
	EgFAR33	31(14.29%)	2(0.92%)	16(7.37%)	21(9.68%)	73(33.64%)	0(0%)	74(34.1%)	97.5%
Ⅱ	EgFAR14	111(15.99%)	4(0.58%)	39(5.62%)	75(10.81%)	297(42.8%)	16(2.31%)	152(21.9%)	99.4%
	EgFAR15	110(15.69%)	4(0.57%)	39(5.56%)	73(10.41%)	280(39.94%)	15(2.14%)	180(25.68%)	98.1%
	EgFAR16	106(14.13%)	4(0.53%)	52(6.93%)	69(9.2%)	272(36.27%)	34(4.53%)	213(28.4%)	94.6%
	EgFAR17	65(12.06%)	4(0.74%)	35(6.49%)	44(8.16%)	245(45.45%)	25(4.64%)	121(22.45%)	98.8%
	EgFAR23	101(14.87%)	2(0.29%)	42(6.19%)	72(10.6%)	280(41.24%)	18(2.65%)	164(24.15%)	97.7%
	EgFAR24	111(16.02%)	4(0.58%)	45(6.49%)	69(9.96%)	277(39.97%)	18(2.6%)	169(24.39%)	97.3%
Ⅲ	EgFAR5	108(17.45%)	2(0.32%)	37(5.98%)	56(9.05%)	267(43.13%)	25(4.04%)	114(18.42%)	99.1%
	EgFAR6	103(16.32%)	2(0.32%)	44(6.97%)	66(10.46%)	259(41.05%)	28(4.44%)	114(18.07%)	99.1%
	EgFAR7	109(16.47%)	4(0.6%)	45(6.8%)	71(10.73%)	222(33.53%)	14(2.11%)	197(29.76%)	95.4%
	EgFAR9	94(14.78%)	6(0.94%)	47(7.39%)	69(10.85%)	251(39.47%)	18(2.83%)	136(21.38%)	98.6%
	EgFAR11	63(25.71%)	2(0.82%)	17(6.94%)	26(10.61%)	66(26.94%)	12(4.9%)	59(24.08%)	99.6%
	EgFAR18	104(16.94%)	2(0.33%)	39(6.35%)	63(10.26%)	266(43.32%)	21(3.42%)	109(17.75%)	99.6%
	EgFAR19	103(12.78%)	6(0.74%)	63(7.82%)	80(9.93%)	289(35.86%)	15(1.86%)	240(29.78%)	93.5%
	EgFAR20	57(11.22%)	4(0.79%)	34(6.69%)	50(9.84%)	206(40.55%)	12(2.36%)	135(26.57%)	97.9%
	EgFAR25	105(16.91%)	2(0.32%)	43(6.92%)	64(10.31%)	245(39.45%)	15(2.42%)	137(22.06%)	99%
	EgFAR26	104(16.72%)	3(0.48%)	41(6.59%)	62(9.97%)	272(43.73%)	18(2.89%)	112(18.01%)	99.8%
	EgFAR27	49(23.33%)	4(1.9%)	13(6.19%)	16(7.62%)	53(25.24%)	9(4.29%)	66(31.43%)	98.4%
	EgFAR28	71(15.04%)	2(0.42%)	36(7.63%)	51(10.81%)	192(40.68%)	12(2.54%)	98(20.76%)	99.1%
