# Supplementary material for: FAR1/FHY3 Transcription Factors Positively Regulate the Salt and Temperature Stress Responses in Eucalyptus grandis
Source: Front Plant Sci. 2022 May 4;13:883654. doi: 10.3389/fpls.2022.883654 (PMC9115564; doi:10.3389/fpls.2022.883654)
Supplement: Supplementary file 5 [file Table_5.XLSX]

## Sheet: Sheet1
The segmentally and tandemly duplicated EgFAR1/FHY3 genes.
Gene 1	Gene 2	Duplication type
EgFAR5	EgFAR14	Segmental
EgFAR5	EgFAR19	Segmental
EgFAR5	EgFAR20	Segmental
EgFAR5	EgFAR26	Segmental
EgFAR6	EgFAR9	Segmental
EgFAR6	EgFAR14	Segmental
EgFAR6	EgFAR26	Segmental
EgFAR11	EgFAR14	Segmental
EgFAR11	EgFAR20	Segmental
EgFAR11	EgFAR26	Segmental
EgFAR11	EgFAR28	Segmental
EgFAR14	EgFAR16	Tandem
EgFAR14	EgFAR19	Segmental
EgFAR14	EgFAR20	Segmental
EgFAR14	EgFAR26	Segmental
EgFAR19	EgFAR25	Segmental
EgFAR19	EgFAR28	Segmental
EgFAR20	EgFAR26	Segmental
EgFAR20	EgFAR28	Segmental
EgFAR25	EgFAR27	Tandem
EgFAR25	EgFAR28	Segmental
