# Supplementary material for: FAR1/FHY3 Transcription Factors Positively Regulate the Salt and Temperature Stress Responses in Eucalyptus grandis
Source: Front Plant Sci. 2022 May 4;13:883654. doi: 10.3389/fpls.2022.883654 (PMC9115564; doi:10.3389/fpls.2022.883654)
Supplement: Supplementary file 6 [file Table_6.XLSX]

## Sheet: Sheet1
The expression data of four EgFAR1/FHY3 genes in response to salt and temperature stresses
		control		100 mM NaCl		200 mM NaCl		4 ℃		40 ℃
	stress_time	mean	SD	mean	SD	mean	SD	mean	SD	mean	SD
EgFAR22	0	1	0.180662	0.78117	0.236641	1.01781	0.00763359	0.798982	0.223919	1.23664	0.549618
	6	1	0.237082	4.47112	0.261398	0.954407	0.0182371	1.6079	0.106383	0.431611	0.0425532
	12	1	0.0522466	0.216301	0.0522466	0.902821	0.015674	1.07524	0.14838	1.85057	0.030303
EgFAR23	0	1	0.117318	1.43575	0.122905	1.43575	0.162011	1.35754	0.0782123	1.31844	0.156425
	6	1	0.316176	11.3971	0.154412	1.68382	0.102941	2.57353	0.470588	0.470588	0.00735294
	12	1	0.109415	0.455471	0.0534351	1.52672	0.109415	1.16285	0.109415	1.63613	0.0890585
EgFAR29	0	1	0.0740741	0.888889	0.037037	1.07407	0.148148	0.555556	0.037037	0.444444	0.0740741
	6	1	0.15	5.35	0.05	1.4	0.15	0.05	0.05	0.05	0.025
	12	1	0.125	0.45	0.075	1.65	0.1	0.175	0.0375	0.775	0.4
EgFAR33	0	1	0.5	1.175	0.6	4.375	1	4.375	0.375	5	0.375
	6	1	0.307692	14.1538	2	5.07692	0.769231	7.76923	0.538462	5.23077	1.23077
	12	1	0.268293	2.53659	0.731707	5.41463	0.121951	3.63415	1.07317	10.6829	0.682927
